# Supplementary material for: Hepatoprotective Effects of Albumin-Encapsulated Nanoparticles of a Curcumin Derivative COP-22 against Lipopolysaccharide/D-Galactosamine-Induced Acute Liver Injury in Mice
Source: MDPI journal article supplement (doi:10.3390/ijms23094903), 2022-04-28
Supplement: s1 [file s1]

**Hepatoprotective effects of albumin-encapsulated nanoparticles of a curcumin derivative COP-22 against Lipopolysaccharide/D-Galactosamine-induced acute liver injury in mice**

Wenwen Mu, Qi Wang, Mingxia Jia, Sijia Dong, Sijie Li, Jie Yang\*, and Guoyun Liu\*

*School of Pharmaceutical Sciences, Liaocheng University, 1 Hunan Street, Liaocheng, Shandong 252059, China*

Supporting Information

\* Corresponding author

Fax: (+86) 15063505132

E-mail: [yangjie1110@163.com](mailto:yangjie1110@163.com); [guoyunliu@126.com](mailto:guoyunliu@126.com)

Table S1. The particle size and the zeta potential of 22 NPs prepared by different conditions.

| Condition | C <sub>COP-22</sub><br>(mg/mL) | C <sub>BSA</sub><br>(%) | t <sub>ultrasonic</sub><br>(min) | particle size<br>(d.nm) | Zeta (mV)  |
|-----------|--------------------------------|-------------------------|----------------------------------|-------------------------|------------|
| 1         | 2                              | 2                       | 30                               | 450.3±41.2              |            |
| 2         | 1                              | 2                       | 30                               | 256.6±27.8              |            |
| 3         | 1                              | 1                       | 30                               | 539.0±29.8              |            |
| 4         | 1                              | 2                       | 40                               | 504.9±22.6              |            |
| 5         | 1                              | 2                       | 20                               | 261.7±13.5              | 1.97±0.06  |
| 6         | 1                              | 2                       | 15                               | 290.8±58.6              | -2.46±0.31 |
| 7         | 1                              | 2                       | 10                               | 218.3±11.1              | -1.06±0.09 |
| 8         | 1                              | 2                       | 5                                | 209.2±4.2               | -18.6±0.3  |
| 9         | 1                              | 2                       | 0                                | 418.4±78.0              | -0.55±0.22 |

Condition 8 is suitable for preparing the 22 NPs, which affords particles with minimum size of 209.2±4.2 nm, and high zeta potential of -18.6±0.3 mV.

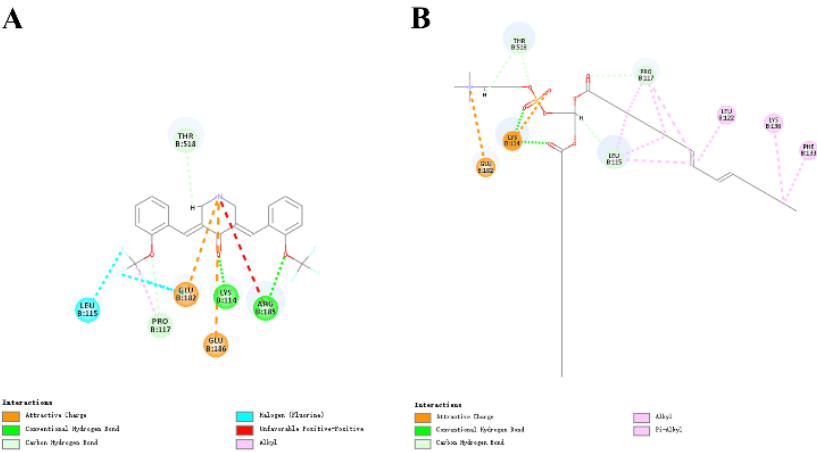

Figure S1. COP-22 and E80 in the binding site of BSA.
